# Supplementary material for: The burden of stroke and its attributable risk factors in the Middle East and North Africa region, 1990–2019
Source: PubMed Central journal article supplement (PMC8854638; doi:10.1038/s41598-022-06418-x), 2022-02-17
Supplement: 41598_2022_6418_MOESM7_ESM.pdf [file 41598_2022_6418_MOESM7_ESM.pdf]

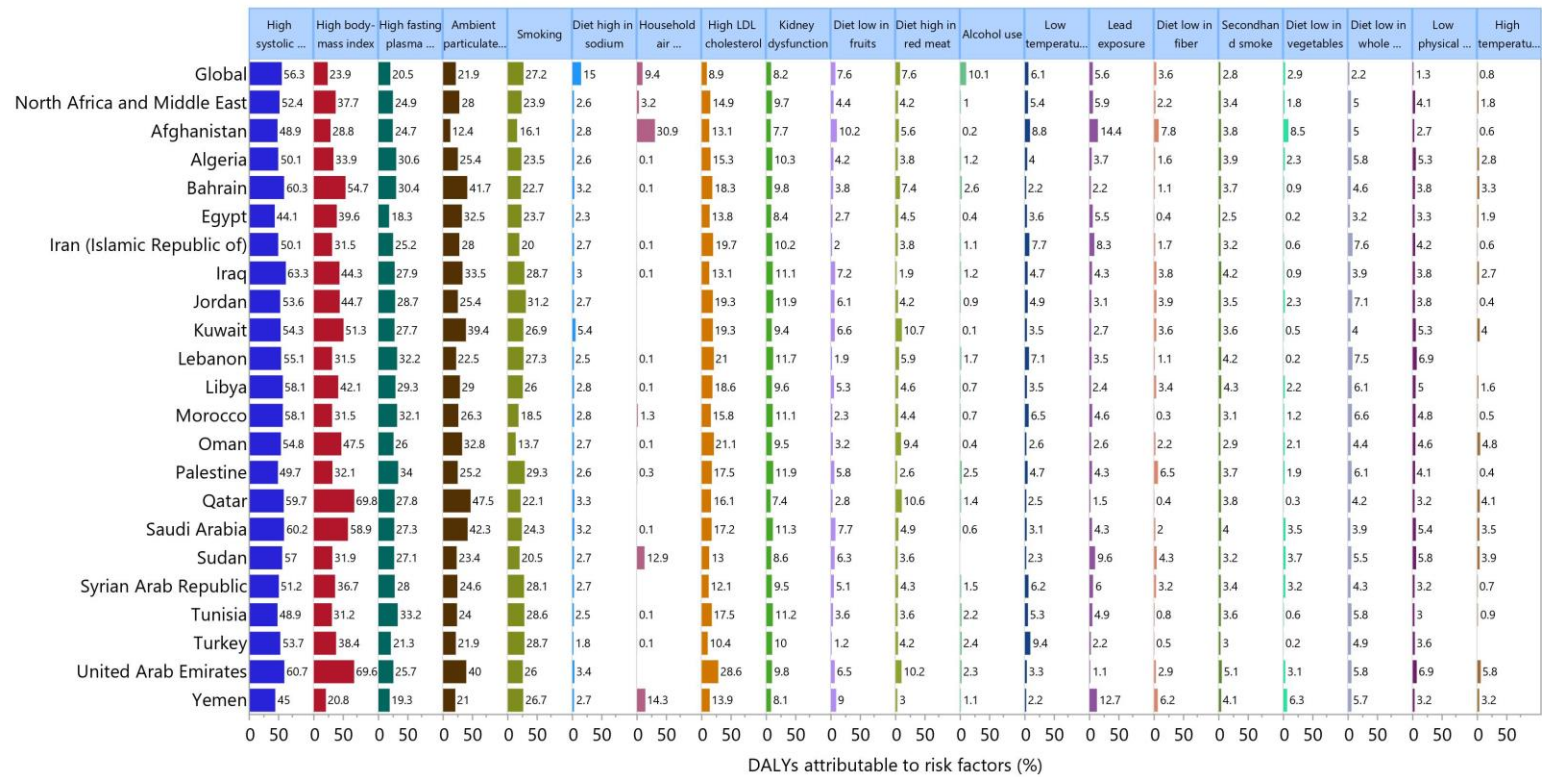

**Figure S7:** Percentage of DALYs due to stroke attributable to risk factors for the Middle East and North Africa countries, males, in 2019.

DALY=disability adjusted life years (Generated from data available from <http://ghdx.healthdata.org/gbd-results-tool>).
