# Supplementary material for: The burden of stroke and its attributable risk factors in the Middle East and North Africa region, 1990–2019
Source: PubMed Central journal article supplement (PMC8854638; doi:10.1038/s41598-022-06418-x), 2022-02-17
Supplement: 41598_2022_6418_MOESM10_ESM.pdf [file 41598_2022_6418_MOESM10_ESM.pdf]

**Table S2: Severity level, lay description, and disability weights for stroke in GBD 2019**

| <b>Acute Stroke</b>                                             |                                                                                                                                                                                |                              |                          |                                   |
|-----------------------------------------------------------------|--------------------------------------------------------------------------------------------------------------------------------------------------------------------------------|------------------------------|--------------------------|-----------------------------------|
| <b>Severity level</b>                                           | <b>Lay description</b>                                                                                                                                                         | <b>Modified Rankin scale</b> | <b>Cognitive status</b>  | <b>Disability weight (95% CI)</b> |
| <b>Mild</b>                                                     | Has some difficulty in moving around and some weakness in one hand, but is able to walk without help.                                                                          | 1                            | N/A                      | 0.019<br>(0.01–0.032)             |
| <b>Moderate</b>                                                 | Has some difficulty in moving around, and in using their hands for lifting and holding things, dressing, and grooming.                                                         | 2,3                          | MoCA≥24<br>or<br>MMSE≥26 | 0.07<br>(0.046–0.099)             |
| <b>Moderate plus cognition problems</b>                         | Has some difficulty in moving around, in using their hands for lifting and holding things, dressing and grooming, and in speaking. The person is often forgetful and confused. | 2,3                          | MoCA<24<br>or<br>MMSE<26 | 0.316 (0.206–0.437)               |
| <b>Severe</b>                                                   | Is confined to bed or a wheelchair, has difficulty speaking, and depends on others for feeding, toileting, and dressing.                                                       | 4, 5                         | MoCA≥24<br>or<br>MMSE≥26 | 0.552 (0.377–0.707)               |
| <b>Severe plus cognition problems</b>                           | Is confined to bed or a wheelchair, depends on others for feeding, toileting, and dressing, and has difficulty speaking, thinking clearly, and remembering things.             | 5?                           | MoCA<24<br>or<br>MMSE<26 | 0.588 (0.411–0.744)               |
| <b>Chronic Stroke</b>                                           |                                                                                                                                                                                |                              |                          |                                   |
| <b>Severity level</b>                                           | <b>Lay description</b>                                                                                                                                                         | <b>Modified Rankin scale</b> | <b>Cognitive status</b>  | <b>Disability weight (95% CI)</b> |
| <b>Asymptomatic</b>                                             |                                                                                                                                                                                | 0                            | N/A                      | N/A                               |
| <b>Long-term consequences, mild</b>                             | Has some difficulty in moving around and some weakness in one hand, but is able to walk without help.                                                                          | 1                            | N/A                      | 0.019<br>(0.01–0.032)             |
| <b>Long-term consequences, moderate</b>                         | Has some difficulty in moving around, and in using their hands for lifting and holding things, dressing, and grooming.                                                         | 2, 3                         | MoCA≥24<br>or<br>MMSE≥26 | 0.07<br>(0.046–0.099)             |
| <b>Long-term consequences, moderate plus cognition problems</b> | Has some difficulty in moving around, in using their hands for lifting and holding things, dressing and grooming, and in speaking. The                                         | 2, 3                         | MoCA<24 or<br>MMSE<26    | 0.316<br>(0.206–0.437)            |

|                                                                          |                                                                                                                                                                    |      |                                        |                        |
|--------------------------------------------------------------------------|--------------------------------------------------------------------------------------------------------------------------------------------------------------------|------|----------------------------------------|------------------------|
|                                                                          | person is often forgetful and confused.                                                                                                                            |      |                                        |                        |
| <b>Long-term consequences, severe</b>                                    | Is confined to bed or a wheelchair, has difficulty speaking, and depends on others for feeding, toileting, and dressing.                                           | 4, 5 | MoCA $\geq$ 24<br>or<br>MMSE $\geq$ 26 | 0.552<br>(0.377–0.707) |
| <b>Long-term consequences, severe plus cognition problems</b>            | Is confined to bed or a wheelchair, depends on others for feeding, toileting, and dressing, and has difficulty speaking, thinking clearly, and remembering things. | 4, 5 | MoCA $<$ 24 or<br>MMSE $<$ 26          | 0.588<br>(0.411–0.744) |
| MMSE: Mini-Mental State Examination; MoCA: Montreal Cognitive Assessment |                                                                                                                                                                    |      |                                        |                        |
