# Supplementary material for: The burden of stroke and its attributable risk factors in the Middle East and North Africa region, 1990–2019
Source: PubMed Central journal article supplement (PMC8854638; doi:10.1038/s41598-022-06418-x), 2022-02-17
Supplement: 41598_2022_6418_MOESM11_ESM.pdf [file 41598_2022_6418_MOESM11_ESM.pdf]

**Table S3: Prevalence of stroke in 1990 and 2019 for both sexes and the percentage change in the age-standardised rates (ASRs) per 100,000 in the North Africa and the Middle East region (Generated from data available from <http://ghdx.healthdata.org/gbd-results-tool>).**

|                                     | 1990                              |                             | 2019                                |                             | Percentage change in ASRs per 100,000 |
|-------------------------------------|-----------------------------------|-----------------------------|-------------------------------------|-----------------------------|---------------------------------------|
|                                     | No (95% UI)                       | ASRs per 100,000 (95% UI)   | No (95% UI)                         | ASRs per 100,000 (95% UI)   |                                       |
| <b>Global</b>                       | 54747917<br>(50221314 , 59562109) | 1320.8<br>(1212.4 , 1440.5) | 101474558<br>(93211910 , 110526302) | 1240.3<br>(1139.7 , 1353)   | -6.1<br>(-7.2 , -5)                   |
| <b>North Africa and Middle East</b> | 3024732<br>(2813282 , 3261908)    | 1545.9<br>(1434.3 , 1673.3) | 7323421<br>(6794727 , 7863138)      | 1537.5<br>(1421.9 , 1659.9) | -0.5<br>(-2.3 , 1.1)                  |
| <b>Afghanistan</b>                  | 122216<br>(113555 , 131443)       | 1597.6<br>(1485.6 , 1723.9) | 281177<br>(260881 , 302740)         | 1657.6<br>(1533.4 , 1779.5) | 3.8<br>(-1.2 , 8)                     |
| <b>Algeria</b>                      | 240104<br>(222748 , 257560)       | 1724.6<br>(1603.2 , 1858.9) | 549736<br>(506627 , 592960)         | 1540.3<br>(1417.2 , 1668)   | -10.7<br>(-14.5 , -7)                 |
| <b>Bahrain</b>                      | 3704<br>(3414 , 4006)             | 1499.7<br>(1387.3 , 1636.7) | 14539<br>(13369 , 15844)            | 1136.4<br>(1049 , 1234.8)   | -24.2<br>(-27.5 , -20.8)              |
| <b>Egypt</b>                        | 504367<br>(467855 , 545560)       | 1523.8<br>(1408.7 , 1660.1) | 1269834<br>(1170811 , 1374639)      | 1806.1<br>(1658.1 , 1974.5) | 18.5<br>(12.9 , 23.9)                 |
| <b>Iran (Islamic Republic of)</b>   | 431372<br>(383019 , 483606)       | 1446.9<br>(1279.8 , 1649.5) | 963512<br>(859232 , 1079662)        | 1253.8<br>(1113.5 , 1418.4) | -13.3<br>(-15.9 , -10.7)              |
| <b>Iraq</b>                         | 192900<br>(179987 , 206361)       | 2177.9<br>(2027.8 , 2349.2) | 520023<br>(483072 , 557268)         | 1968.8<br>(1823.4 , 2122.1) | -9.6<br>(-13.3 , -5.4)                |
| <b>Jordan</b>                       | 37547<br>(34844 , 40187)          | 2342.5<br>(2150.9 , 2519.7) | 134580<br>(123260 , 145467)         | 1793.9<br>(1621.2 , 1952.9) | -23.4<br>(-27.7 , -19.5)              |
| <b>Kuwait</b>                       | 11625<br>(10711 , 12622)          | 1307.7<br>(1215 , 1402.4)   | 42739<br>(39334 , 46356)            | 1230.6<br>(1134.6 , 1332.5) | -5.9<br>(-10.4 , -1.4)                |
| <b>Lebanon</b>                      | 33382<br>(30919 , 35892)          | 1395<br>(1289.8 , 1503.7)   | 74841<br>(69385 , 80771)            | 1425.1<br>(1320.3 , 1538.1) | 2.2<br>(-1.8 , 6.6)                   |
| <b>Libya</b>                        | 29993<br>(27884 , 32381)          | 1393.6<br>(1294.4 , 1505.9) | 90351<br>(83440 , 96922)            | 1588.4<br>(1461.7 , 1712.9) | 14<br>(8.9 , 18.7)                    |
| <b>Morocco</b>                      | 252946<br>(235352 , 272302)       | 1638.9<br>(1517 , 1774.3)   | 557119<br>(515485 , 599727)         | 1695.1<br>(1563.4 , 1833.2) | 3.4<br>(-0.7 , 8.2)                   |
| <b>Oman</b>                         | 14093<br>(13024 , 15374)          | 1666.8<br>(1535.5 , 1837.5) | 37722<br>(34606 , 41220)            | 1525.6<br>(1399.9 , 1686.6) | -8.5<br>(-12.4 , -4.5)                |
| <b>Palestine</b>                    | 15462<br>(14213 , 16720)          | 1569.1<br>(1439.1 , 1706)   | 41305<br>(37846 , 45067)            | 1510.8<br>(1381.5 , 1666.5) | -3.7<br>(-8.5 , 1.4)                  |
| <b>Qatar</b>                        | 3339<br>(3061 , 3630)             | 1575.7<br>(1457.5 , 1705.2) | 22335<br>(20296 , 24525)            | 1226.3<br>(1127.4 , 1327.2) | -22.2<br>(-25.6 , -18.9)              |

|                             |                                    |                                    |                                       |                                    |                                 |
|-----------------------------|------------------------------------|------------------------------------|---------------------------------------|------------------------------------|---------------------------------|
| <b>Saudi Arabia</b>         | <b>141842</b><br>(127066 , 160582) | <b>1823.4</b><br>(1631.5 , 2105.7) | <b>480500</b><br>(442193 , 523176)    | <b>1967.7</b><br>(1818.1 , 2143.5) | <b>7.9</b><br>(-0.1 , 15.2)     |
| <b>Sudan</b>                | <b>177207</b><br>(164323 , 190896) | <b>1650.5</b><br>(1527.1 , 1787.5) | <b>398038</b><br>(367084 , 427930)    | <b>1785.8</b><br>(1645.2 , 1936.9) | <b>8.2</b><br>(3.7 , 12.8)      |
| <b>Syrian Arab Republic</b> | <b>111550</b><br>(103635 , 119384) | <b>1763.3</b><br>(1639.3 , 1893.7) | <b>199599</b><br>(184381 , 215112)    | <b>1518.7</b><br>(1403.8 , 1637.5) | <b>-13.9</b><br>(-17.3 , -10.5) |
| <b>Tunisia</b>              | <b>56128</b><br>(51155 , 60995)    | <b>1032.7</b><br>(941.1 , 1123.3)  | <b>159928</b><br>(147442 , 173396)    | <b>1260.8</b><br>(1162.6 , 1366)   | <b>22.1</b><br>(16.3 , 28.2)    |
| <b>Turkey</b>               | <b>531336</b><br>(492582 , 571402) | <b>1328.5</b><br>(1232.1 , 1434.1) | <b>1080379</b><br>(1002616 , 1164932) | <b>1213.6</b><br>(1124.7 , 1309.4) | <b>-8.7</b><br>(-12.4 , -4.6)   |
| <b>United Arab Emirates</b> | <b>16652</b><br>(15355 , 18115)    | <b>2405.6</b><br>(2215 , 2643.8)   | <b>136808</b><br>(125534 , 148340)    | <b>2225.7</b><br>(2037.3 , 2436.3) | <b>-7.5</b><br>(-11.6 , -3.6)   |
| <b>Yemen</b>                | <b>94933</b><br>(88038 , 102136)   | <b>1596.2</b><br>(1482.1 , 1716.9) | <b>260915</b><br>(242029 , 280821)    | <b>1609.4</b><br>(1480.2 , 1745.5) | <b>0.8</b><br>(-4.2 , 5.7)      |
