# Supplementary material for: The burden of stroke and its attributable risk factors in the Middle East and North Africa region, 1990–2019
Source: PubMed Central journal article supplement (PMC8854638; doi:10.1038/s41598-022-06418-x), 2022-02-17
Supplement: 41598_2022_6418_MOESM12_ESM.pdf [file 41598_2022_6418_MOESM12_ESM.pdf]

**Table S4: Deaths from stroke in 1990 and 2019 for both sexes and the percentage change in the age-standardised rates (ASRs) per 100,000 in the North Africa and the Middle East region (Generated from data available from <http://ghdx.healthdata.org/gbd-results-tool>).**

|                                     | 1990                           |                           | 2019                           |                           | Percentage change in ASRs per 100,000 |
|-------------------------------------|--------------------------------|---------------------------|--------------------------------|---------------------------|---------------------------------------|
|                                     | No (95% UI)                    | ASRs per 100,000 (95% UI) | No (95% UI)                    | ASRs per 100,000 (95% UI) |                                       |
| <b>Global</b>                       | 4574085<br>(4295926 , 4892808) | 132.4<br>(123.1 , 141.7)  | 6552725<br>(5995200 , 7015139) | 84.2<br>(76.8 , 90.2)     | -36.4<br>(-41.6 , -31.2)              |
| <b>North Africa and Middle East</b> | 177871<br>(159935 , 195301)    | 121.4<br>(105.8 , 134.5)  | 312220<br>(278450 , 349726)    | 87.7<br>(78.2 , 97.6)     | -27.8<br>(-35.4 , -16)                |
| <b>Afghanistan</b>                  | 12072<br>(8312 , 15669)        | 198.6<br>(135.7 , 257.5)  | 16816<br>(11747 , 21934)       | 161.5<br>(110.3 , 208.5)  | -18.7<br>(-36.1 , -1.6)               |
| <b>Algeria</b>                      | 14008<br>(11454 , 17145)       | 179.4<br>(149.3 , 211.2)  | 24811<br>(19995 , 30219)       | 101.5<br>(82.6 , 121.6)   | -43.4<br>(-54.9 , -30.2)              |
| <b>Bahrain</b>                      | 117<br>(102 , 134)             | 102.5<br>(90.2 , 118.9)   | 245<br>(200 , 310)             | 52.8<br>(43.5 , 66.9)     | -48.5<br>(-58.4 , -36.5)              |
| <b>Egypt</b>                        | 34626<br>(29818 , 39550)       | 110.8<br>(93.9 , 129)     | 45767<br>(33557 , 63157)       | 85.7<br>(63.1 , 118.9)    | -22.6<br>(-42.6 , 1.6)                |
| <b>Iran (Islamic Republic of)</b>   | 21698<br>(18964 , 23908)       | 120.7<br>(102.8 , 133.5)  | 40912<br>(36741 , 43849)       | 66.2<br>(58.7 , 71.3)     | -45.1<br>(-50.6 , -35.4)              |
| <b>Iraq</b>                         | 11731<br>(9897 , 13689)        | 166.1<br>(140.6 , 193.9)  | 26256<br>(21422 , 31075)       | 143.3<br>(119.2 , 166.1)  | -13.7<br>(-30.2 , 4.5)                |
| <b>Jordan</b>                       | 1426<br>(1185 , 1662)          | 150.9<br>(123.6 , 175.4)  | 3367<br>(2758 , 3983)          | 75.7<br>(61.3 , 89)       | -49.8<br>(-59.4 , -39.2)              |
| <b>Kuwait</b>                       | 229<br>(202 , 252)             | 51.5<br>(44.4 , 57.6)     | 920<br>(757 , 1093)            | 46.5<br>(38 , 55.2)       | -9.6<br>(-24.2 , 7.7)                 |
| <b>Lebanon</b>                      | 974<br>(820 , 1163)            | 58.1<br>(48.4 , 69.3)     | 1764<br>(1236 , 2298)          | 35.2<br>(24.5 , 45.6)     | -39.5<br>(-55.5 , -19.2)              |
| <b>Libya</b>                        | 1565<br>(1250 , 1936)          | 84.6<br>(66.2 , 107)      | 3086<br>(2364 , 4016)          | 69.4<br>(53 , 90.1)       | -17.9<br>(-36.4 , 7.9)                |
| <b>Morocco</b>                      | 14768<br>(11718 , 17757)       | 132.2<br>(102.8 , 158.4)  | 29033<br>(23331 , 35135)       | 116.4<br>(94.2 , 139.3)   | -11.9<br>(-29.1 , 8)                  |
| <b>Oman</b>                         | 754<br>(581 , 955)             | 145.7<br>(112.8 , 183)    | 1030<br>(895 , 1196)           | 103.7<br>(90.7 , 118.7)   | -28.8<br>(-45 , -3.7)                 |
| <b>Palestine</b>                    | 1264<br>(1026 , 1532)          | 172.5<br>(141 , 208.3)    | 2019<br>(1740 , 2286)          | 122.4<br>(105.6 , 138.2)  | -29.1<br>(-43.5 , -10.1)              |
| <b>Qatar</b>                        | 61<br>(48 , 79)                | 83.5<br>(63.4 , 108.7)    | 181<br>(136 , 239)             | 52.9<br>(42.5 , 69.2)     | -36.7<br>(-54 , -15.7)                |

|                             |                                        |                                        |                                        |                                        |                                       |
|-----------------------------|----------------------------------------|----------------------------------------|----------------------------------------|----------------------------------------|---------------------------------------|
| <b>Saudi Arabia</b>         | <b>6915</b><br><b>(5388 , 8557)</b>    | <b>152.2</b><br><b>(119.3 , 186.2)</b> | <b>12669</b><br><b>(9750 , 15359)</b>  | <b>102.7</b><br><b>(80.4 , 120.5)</b>  | <b>-32.5</b><br><b>(-49.1 , -10)</b>  |
| <b>Sudan</b>                | <b>14579</b><br><b>(11025 , 18829)</b> | <b>177.4</b><br><b>(127.6 , 228.6)</b> | <b>19638</b><br><b>(14425 , 27765)</b> | <b>125.2</b><br><b>(92.6 , 174.9)</b>  | <b>-29.4</b><br><b>(-42.2 , -12)</b>  |
| <b>Syrian Arab Republic</b> | <b>7385</b><br><b>(6165 , 8746)</b>    | <b>146</b><br><b>(120.2 , 176.6)</b>   | <b>9186</b><br><b>(7117 , 11838)</b>   | <b>99</b><br><b>(78.3 , 124.9)</b>     | <b>-32.2</b><br><b>(-50.2 , -8.6)</b> |
| <b>Tunisia</b>              | <b>4063</b><br><b>(3398 , 4805)</b>    | <b>106.6</b><br><b>(88.9 , 126.5)</b>  | <b>8713</b><br><b>(6627 , 11147)</b>   | <b>80</b><br><b>(60.6 , 101.4)</b>     | <b>-25</b><br><b>(-43.8 , -0.6)</b>   |
| <b>Turkey</b>               | <b>22143</b><br><b>(18070 , 29102)</b> | <b>72.6</b><br><b>(58.2 , 96.1)</b>    | <b>48947</b><br><b>(39204 , 59511)</b> | <b>60.6</b><br><b>(48.7 , 73.6)</b>    | <b>-16.5</b><br><b>(-39.5 , 6.2)</b>  |
| <b>United Arab Emirates</b> | <b>483</b><br><b>(368 , 678)</b>       | <b>182.5</b><br><b>(145.5 , 246.2)</b> | <b>2168</b><br><b>(1544 , 3026)</b>    | <b>91.3</b><br><b>(70.2 , 118.7)</b>   | <b>-50</b><br><b>(-62 , -34.9)</b>    |
| <b>Yemen</b>                | <b>6892</b><br><b>(5025 , 8969)</b>    | <b>174.2</b><br><b>(121.5 , 227.9)</b> | <b>14375</b><br><b>(10909 , 18865)</b> | <b>135.7</b><br><b>(102.4 , 176.6)</b> | <b>-22.1</b><br><b>(-38.2 , 0.7)</b>  |
