# Supplementary material for: The burden of stroke and its attributable risk factors in the Middle East and North Africa region, 1990–2019
Source: PubMed Central journal article supplement (PMC8854638; doi:10.1038/s41598-022-06418-x), 2022-02-17
Supplement: 41598_2022_6418_MOESM13_ESM.pdf [file 41598_2022_6418_MOESM13_ESM.pdf]

**Table S5: DALYs due to stroke in 1990 and 2019 for both sexes and the percentage change in the age-standardised rates (ASRs) per 100,000 in the North Africa and the Middle East region. DALY= disability-adjusted-life-years.**

**(Generated from data available from <http://ghdx.healthdata.org/gbd-results-tool>).**

|                                     | 1990                                 |                             | 2019                                 |                             | Percentage change in ASRs per 100,000 |
|-------------------------------------|--------------------------------------|-----------------------------|--------------------------------------|-----------------------------|---------------------------------------|
|                                     | No (95% UI)                          | ASRs per 100,000 (95% UI)   | No (95% UI)                          | ASRs per 100,000 (95% UI)   |                                       |
| <b>Global</b>                       | 108206654<br>(102415590 , 114799148) | 2729.9<br>(2579.9 , 2901.2) | 143232184<br>(133095809 , 153241824) | 1768.1<br>(1640.6 , 1889.4) | -35.2<br>(-40.5 , -30.5)              |
| <b>North Africa and Middle East</b> | 5543905<br>(5046736 , 6029506)       | 2685.3<br>(2433.7 , 2947.3) | 7946004<br>(7060209 , 8870766)       | 1826.2<br>(1635.3 , 2026.2) | -32<br>(-39.1 , -23.3)                |
| <b>Afghanistan</b>                  | 324968<br>(236526 , 415319)          | 4471.6<br>(3212.1 , 5710.6) | 507837<br>(375947 , 659772)          | 3498.2<br>(2508.8 , 4500.4) | -21.8<br>(-39.4 , -3.6)               |
| <b>Algeria</b>                      | 370111<br>(305580 , 443675)          | 3167.5<br>(2642 , 3755.9)   | 543945<br>(450965 , 649230)          | 1755.4<br>(1459.6 , 2081.9) | -44.6<br>(-55 , -31.9)                |
| <b>Bahrain</b>                      | 3785<br>(3376 , 4272)                | 1981.3<br>(1768.7 , 2241.6) | 7987<br>(6663 , 9690)                | 940.9<br>(796.8 , 1146.2)   | -52.5<br>(-61.2 , -42.5)              |
| <b>Egypt</b>                        | 1613654<br>(1260360 , 1974374)       | 3316<br>(2889.1 , 3785.7)   | 1493970<br>(1146402 , 1946512)       | 2138<br>(1636.8 , 2809.8)   | -35.5<br>(-50 , -17)                  |
| <b>Iran (Islamic Republic of)</b>   | 597142<br>(547356 , 651017)          | 2324.3<br>(2051.8 , 2547)   | 884768<br>(812248 , 943655)          | 1262.2<br>(1153.5 , 1346.3) | -45.7<br>(-51 , -38.3)                |
| <b>Iraq</b>                         | 313596<br>(268605 , 361460)          | 3625.9<br>(3103.7 , 4212.9) | 682943<br>(548026 , 826273)          | 2922.9<br>(2399 , 3459.1)   | -19.4<br>(-35.5 , -0.8)               |
| <b>Jordan</b>                       | 36836<br>(31690 , 42514)             | 2910<br>(2466.9 , 3357.8)   | 86118<br>(72852 , 100150)            | 1448<br>(1220.4 , 1679.5)   | -50.2<br>(-58.7 , -41.1)              |
| <b>Kuwait</b>                       | 7651<br>(6893 , 8401)                | 1062.6<br>(953.7 , 1169.4)  | 25463<br>(21787 , 29824)             | 938.4<br>(795 , 1093.3)     | -11.7<br>(-24 , 3.3)                  |
| <b>Lebanon</b>                      | 24063<br>(20791 , 28154)             | 1135.7<br>(980.3 , 1327.2)  | 39216<br>(30874 , 48709)             | 752.9<br>(593.3 , 935.9)    | -33.7<br>(-47.6 , -16)                |
| <b>Libya</b>                        | 53989<br>(43012 , 67225)             | 1996.7<br>(1628.5 , 2421.5) | 82320<br>(64181 , 104686)            | 1570.5<br>(1237.3 , 2001.2) | -21.3<br>(-37.5 , 1.4)                |
| <b>Morocco</b>                      | 387163<br>(322955 , 461398)          | 2727.6<br>(2237.6 , 3235.4) | 666284<br>(534574 , 808810)          | 2257.8<br>(1838.8 , 2702.5) | -17.2<br>(-33.9 , 0.9)                |
| <b>Oman</b>                         | 24370<br>(19405 , 30109)             | 3071.8<br>(2428.5 , 3824)   | 30859<br>(27010 , 36651)             | 1884.3<br>(1667.3 , 2127.1) | -38.7<br>(-51.9 , -20.7)              |
| <b>Palestine</b>                    | 27471<br>(22492 , 33079)             | 3154.1<br>(2576 , 3790.5)   | 44902<br>(39457 , 50763)             | 2128.3<br>(1878.2 , 2399.7) | -32.5<br>(-46.4 , -15)                |
| <b>Qatar</b>                        | 2523<br>(2095 , 3130)                | 1635.2<br>(1336.8 , 2028.2) | 8998<br>(7254 , 11097)               | 904.5<br>(747.6 , 1130.3)   | -44.7<br>(-57.5 , -29.5)              |

|                             |                                    |                                    |                                     |                                    |                                 |
|-----------------------------|------------------------------------|------------------------------------|-------------------------------------|------------------------------------|---------------------------------|
| <b>Saudi Arabia</b>         | <b>182379</b><br>(143752 , 225284) | <b>2982.3</b><br>(2362.6 , 3635)   | <b>417599</b><br>(326188 , 509857)  | <b>2114.9</b><br>(1685.1 , 2485.5) | <b>-29.1</b><br>(-46.4 , -5.6)  |
| <b>Sudan</b>                | <b>429900</b><br>(336046 , 549190) | <b>3858.9</b><br>(2972.6 , 4948.3) | <b>522412</b><br>(385879 , 715571)  | <b>2585.5</b><br>(1970.5 , 3552.9) | <b>-33</b><br>(-45.3 , -16.9)   |
| <b>Syrian Arab Republic</b> | <b>252719</b><br>(210208 , 297392) | <b>3375.3</b><br>(2823.7 , 3954.9) | <b>238333</b><br>(184920 , 304410)  | <b>2018.1</b><br>(1589.6 , 2547.1) | <b>-40.2</b><br>(-55.3 , -19.9) |
| <b>Tunisia</b>              | <b>96577</b><br>(82234 , 112798)   | <b>1961.4</b><br>(1663.1 , 2298.3) | <b>176891</b><br>(135395 , 225499)  | <b>1477.5</b><br>(1138.5 , 1875)   | <b>-24.7</b><br>(-42.8 , -2)    |
| <b>Turkey</b>               | <b>566638</b><br>(488799 , 711293) | <b>1520.5</b><br>(1299.1 , 1911)   | <b>993082</b><br>(820881 , 1177528) | <b>1162.6</b><br>(965 , 1380.4)    | <b>-23.5</b><br>(-42.5 , -5.2)  |
| <b>United Arab Emirates</b> | <b>18494</b><br>(14520 , 24703)    | <b>3565.6</b><br>(2877.6 , 4746.3) | <b>95518</b><br>(70890 , 128945)    | <b>1925.6</b><br>(1517 , 2457.9)   | <b>-46</b><br>(-58.5 , -30.5)   |
| <b>Yemen</b>                | <b>206145</b><br>(157464 , 261474) | <b>3663.8</b><br>(2666.7 , 4746.9) | <b>388486</b><br>(302567 , 500074)  | <b>2765.5</b><br>(2161.6 , 3520.5) | <b>-24.5</b><br>(-41 , -1.9)    |
